# Supplementary material for: Exploring the interactions betweenLactobacillus rhamnosusGG and whey protein isolate for preservation of the viability of bacteria through spray drying
Source: Royal Society of Chemistry journal article supplement (doi:10.1039/d0fo02906h), 2021-01-01
Supplement: d0fo02906h1.pdf [file d0fo02906h1.pdf]

**Supplementary information**

**Exploring the interactions between *Lactobacillus rhamnosus* GG  
and whey protein isolate for preservation of the viability of  
bacteria through spray drying**

**Wenjie Lu <sup>a</sup>, Nan Fu <sup>a,\*</sup>, Meng Wai Woo <sup>b</sup>, Xiao Dong Chen <sup>a</sup>**

<sup>a</sup> China-Australia Joint Research Center of Future Dairy Manufacturing, School of Chemical and Environmental Engineering, College of Chemistry, Chemical Engineering and Materials Science, Soochow University, Suzhou, Jiangsu 215123, China

<sup>b</sup> Department of Chemical & Materials Engineering, The University of Auckland, 5-7 Grafton Road, Auckland 1010, New Zealand

**\* Corresponding author:**

**N. Fu, Email:** nan.fu@suda.edu.cn; **Tel:** +86-512-65883267; **Fax:** +86-512-65882750

**Address:** China-Australia Joint Research Center of Future Dairy Manufacturing, School of Chemical and Environmental Engineering, College of Chemistry, Chemical Engineering and Materials Science, Soochow University, 199 Ren-Ai Rd., Suzhou Industrial Park, 215123 Suzhou, Jiangsu, China.

## **Section S1. Supporting methods**

### **S1.1. Visualization of the integrity of LGG cellular membrane using confocal laser scanning microscopy (CLSM)**

The integrity of the cellular membrane of LGG in different LGG samples was examined by staining the cells with Live/Dead<sup>®</sup> BacLight<sup>™</sup> fluorescence probe kit (L-7012, Thermofisher, USA) followed by CLSM observation. LGG cells collected from different samples were resuspended in 0.85 wt.% NaCl. Then, 3  $\mu$ L fluorescence dye, which was prepared following product specification, was added to 1 mL LGG suspension. The mixture was incubated in dark at room temperature for 15 min. The stained samples were observed using an upright Leica TCS SP8 microscope (Leica Microsystems, Wetzlar, Germany).

### **S1.2. Measurement of calcium concentration in WPI solution**

WPI was reconstituted following the method described in Section 2.1 and diluted into a series of dilutions between 0.1 and 1 wt.%. The stock solution of Ca<sup>2+</sup> standard was prepared by dissolving 2.769 g CaCl<sub>2</sub> in deionized water to prepare 1 L solution, giving a Ca<sup>2+</sup> concentration of 1000 mg/L. The stock solution was diluted to 10 mg/L, and the standard Ca<sup>2+</sup> solutions with concentrations of 0, 2, 4 and 8 mg/L were prepared. The standards and WPI samples were measured with inductively-coupled plasma spectrometer (ICP; 710-ES, Varian China Co. Ltd., American). The results of WPI sample at appropriate dilutions were compared to the obtained standard curve to determine Ca<sup>2+</sup> concentration.

## **Section S2. Supporting results**

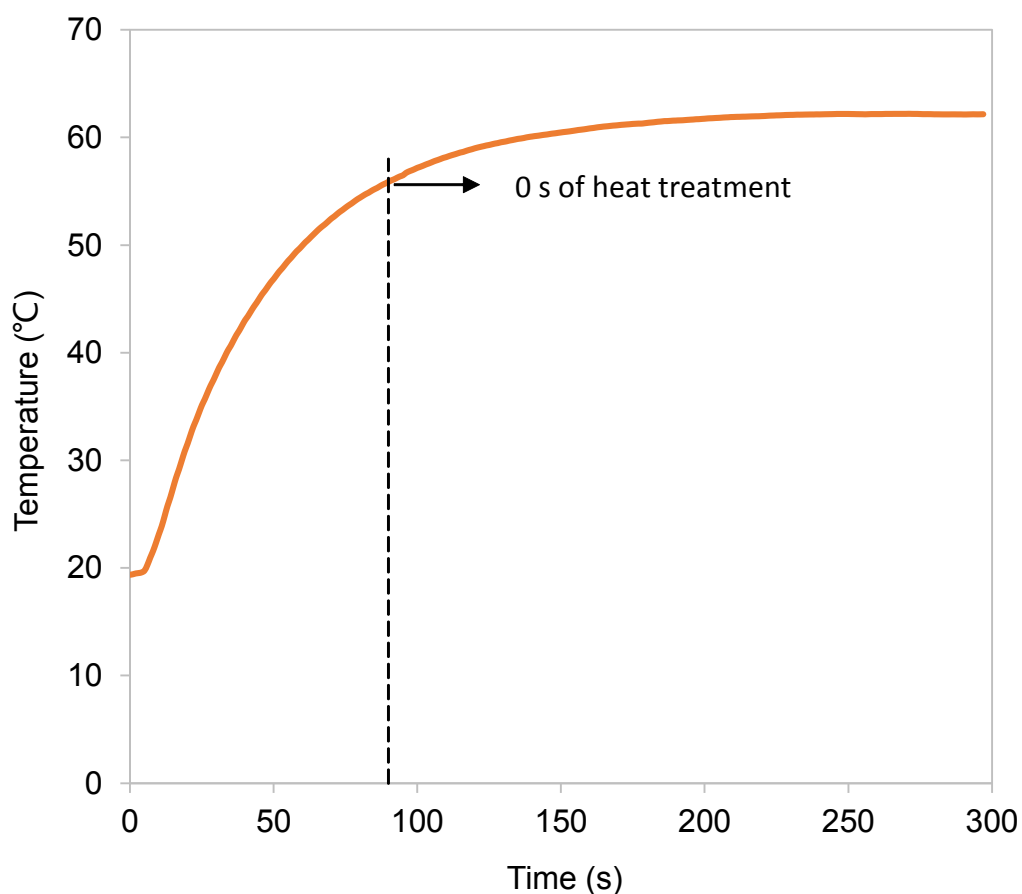

**Figure S1.** The temperature profile of LGG samples during heat treatment at 62 °C. The temperature measurement was performed with 1 mL of deionized water placed in a 2 mL centrifuge tube, which was then heated in a water bath at 62 °C. Changes in sample temperature were monitored with a Type-K thermocouple inserted at the center of the sample, and were recorded by a data-logger (TC-08, Pico Technology, UK).

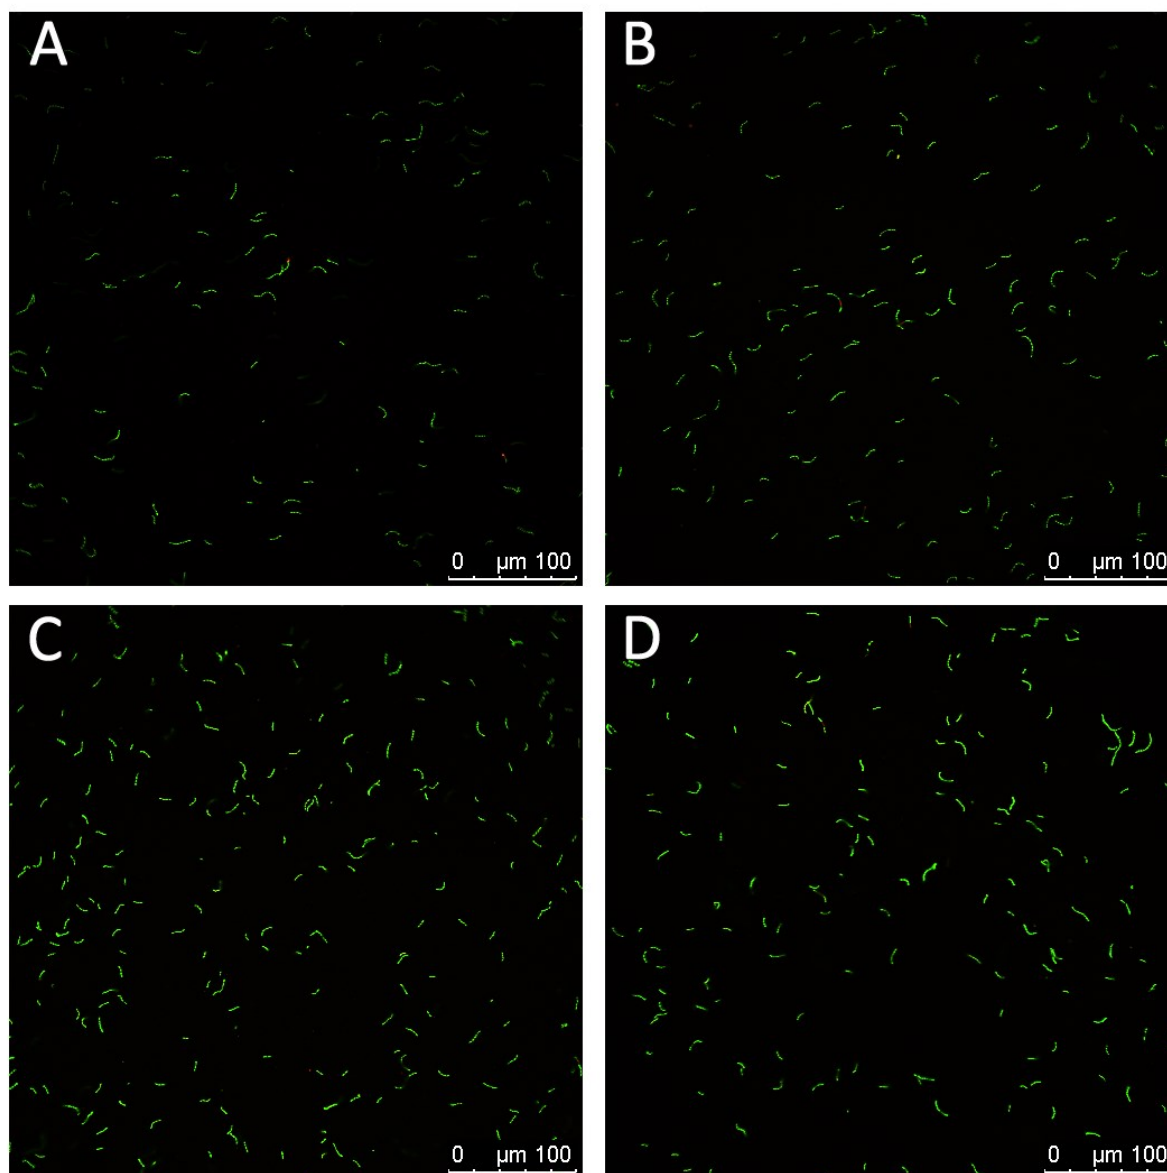

**Figure S2.** The integrity of cellular membrane of LGG cells after WPI adsorption treatment for 10 or 60 min. (A) LGG@0.85%NaCl; (B) LGG@10%Tre; (C) LGG-WPI<sub>10</sub>@10%Tre; (D) LGG-WPI<sub>60</sub>@10%Tre. All types of cell samples were stained with Live/Dead<sup>®</sup> BacLight™ kit, with green fluorescence indicating live cells with intact membrane.

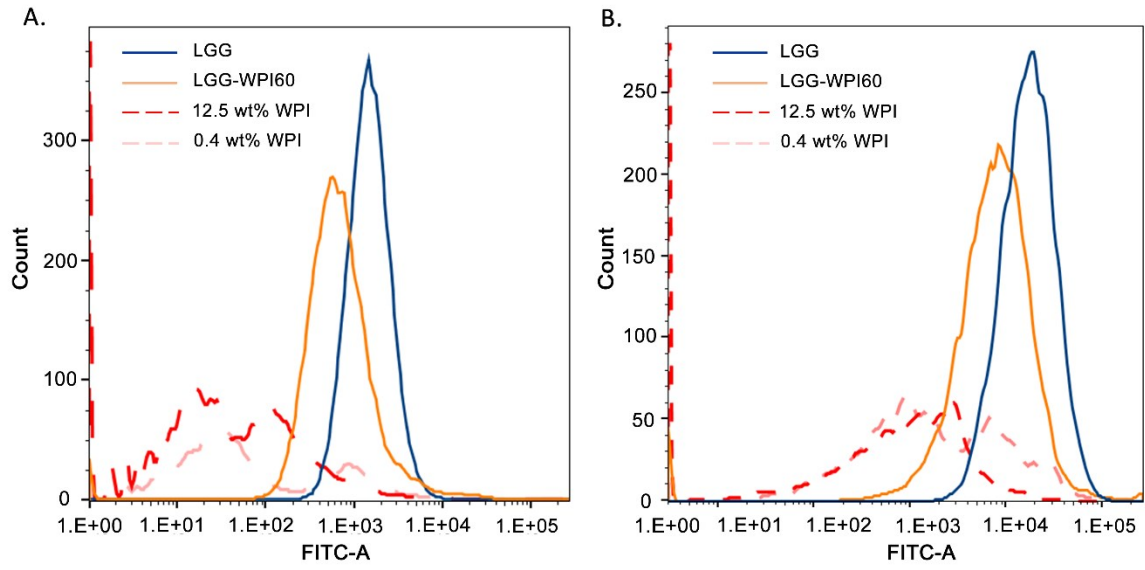

**Figure S3.** Flow cytometric analysis of different LGG samples with and without WPI adsorption treatment, using (A) 0.01 mg/mL FITC and (B) 0.1 mg/mL FITC to label LGG cells.
